# Supplementary material for: Anxious but Thoroughly Informed? No Jumping-to-Conclusions Bias in Social Anxiety Disorder
Source: Springer Nature journal article supplement (doi:10.1007/s10608-015-9724-2), 2015-09-14
Supplement: MOESM1 [file 797964]

Supplement 1: Average Values and Standard Deviations, including comparisons with previous JTC scores in comparable studies.

The following three tables include mean values and standard deviations for the three dependent variables draws-to-decision (DTD; table 1), information value (table 2) and reported certainty at decision (table 3). Average group values and standard deviations are presented for the healthy control (HC) group and participants with social anxiety disorder (SAD). Furthermore, average values for subsamples of the SAD group based on comorbidity status (without comorbidity versus with comorbidity) and SAD subtype (specific vs. generalized) are included

In order to further ensure that any difference we found was due to the SAD groups deviating from data-gathering of healthy participants, we tested the average group responses of any significant finding against pre-established norms from previous samples using two-sided one-sample *t*-tests. For the standard beads task, these norms were taken from a similar fish task with probability-rating on 938 healthy participants (Moritz, Van Quaquebeke & Lincoln, 2012). For the SBT, we took the reference values from the sample it was validated on (*n* = 92).

Table 1.

*Descriptive Values for Draws to Decision across Groups and Beads Task Variation*

|  | Fish Task | SBT neutral | SBT paranoia | SBT social phobic |
| --- | --- | --- | --- | --- |
| Draws to decision (M, SD) |  |  |  |  |
| *Reference values from independent samples* | *2.18* | *6.88* | *6.23* | *6.42* |
| HC (n = 56) | 3.11+ (2.10) | 6.42 (2.19) | 5.76 (2.12) | 5.99 (2.11) |
| SAD total (n = 60) | 4.15+ (2.08) | 6.74 (2.24) | 6.21 (2.40) | 6.31 (2.37) |
| no comorbidity (n = 21) | 4.29+ (1.58) | 7.42 (2.61) | 7.07 (2.63) | 7.13 (2.53) |
| with comorbidities (n = 39) | 4.08+ (2.32) | 6.38 (2.88) | 5.74 (2.88) | 5.86 (2.88) |
| Specific SAD (n = 49) | 4.20+ (2.04) | 6.97 (2.07) | 6.58 (2.20) | 6.53 (2.22) |
| Generalized SAD (n = 11) | 3.95+ (2.36) | 5.74- (2.79) | 4.55- (2.68) | 5.32 (2.86) |

Note. SBT = Social Beads Task; SAD = Social anxiety disorder; HC = Healthy controls. +/- = significantly more/less than the reference value (one sample t-test, two-sided, p < 0.05)

Table 2.

*Descriptive Values for Information Value at Decision across Groups and Beads Task Conditions*

|  | Fish Task | SBT neutral | SBT paranoia | SBT social phobic |
| --- | --- | --- | --- | --- |
| Information value (M, SD) |  |  |  |  |
| *Reference values from independent samples* |  | *3.44* | *3.28* | *3.17* |
| HC | - | 3.00- (1.43) | 2.83- (1.30) | 2.98 (1.31) |
| SAD total | - | 3.30 (1.57) | 3.07 (1.58) | 3.17 (1.58) |
| no comorbidity | - | 3.81 (1.36) | 3.65 (1.37) | 3.70 (1.51) |
| with comorbidities | - | 3.02 (1.62) | 2.75- (1.61) | 2.88 (1.56) |
| Specific SAD | - | 3.44 (1.55) | 3.26 (1.53) | 3.29 (1.53) |
| Generalized SAD | - | 2.64 (1.56) | 2.20- (1.60) | 2.65 (1.74) |

Note. SBT = Social Beads Task; SAD = Social anxiety disorder; HC = Healthy controls. +/- = significantly more/less than the reference value (one sample t-test, two-sided)

Table 3.

*Descriptive Values for Certainty at Decision across Groups and Beads Task Variation*

|  | Fish Task | SBT neutral | SBT paranoia | SBT social phobic |
| --- | --- | --- | --- | --- |
| Probability rating (M, SD) |  |  |  |  |
| *Reference values from independent samples* | *0.74* | *0.71* | *0.72* | *0.71* |
| HC | 0.73 (0.23) | 0.77+ (0.11) | 0.78+ (0.13) | 0.79+ (0.13) |
| SAD total | 0.83+ (0.17) | 0.77+ (0.11) | 0.82+ (0.12) | 0.81+ (0.13) |
| without comorbidity | 0.87+ (0.15) | 0.81+ (0.08) | 0.84+ (0.10) | 0.84+ (0.10) |
| with comorbidities | 0.81+ (0.18) | 0.76+ (0.12) | 0.80+ (0.12) | 0.80+ (0.13) |
| Specific SAD | 0.84+ (0.17) | 0.78+ (0.11) | 0.82+ (0.11) | 0.81+ (0.13) |
| Generalized SAD | 0.81 (0.18) | 0.76 (0.11) | 0.82+ (0.13) | 0.81+ (0.13) |

Note. SBT = Social Beads Task; SAD = Social anxiety disorder; HC = Healthy controls. +/- = significantly more/less than the reference value (one sample t-test, two-sided)
